# Supplementary figures and images for: System analysis based on the cancer–immunity cycle identifies ZNF207 as a novel immunotherapy target for hepatocellular carcinoma
Source: HighWire-hosted journal article supplement (doi:10.1136/jitc-2021-004414), 2022-03-01

Figure S2

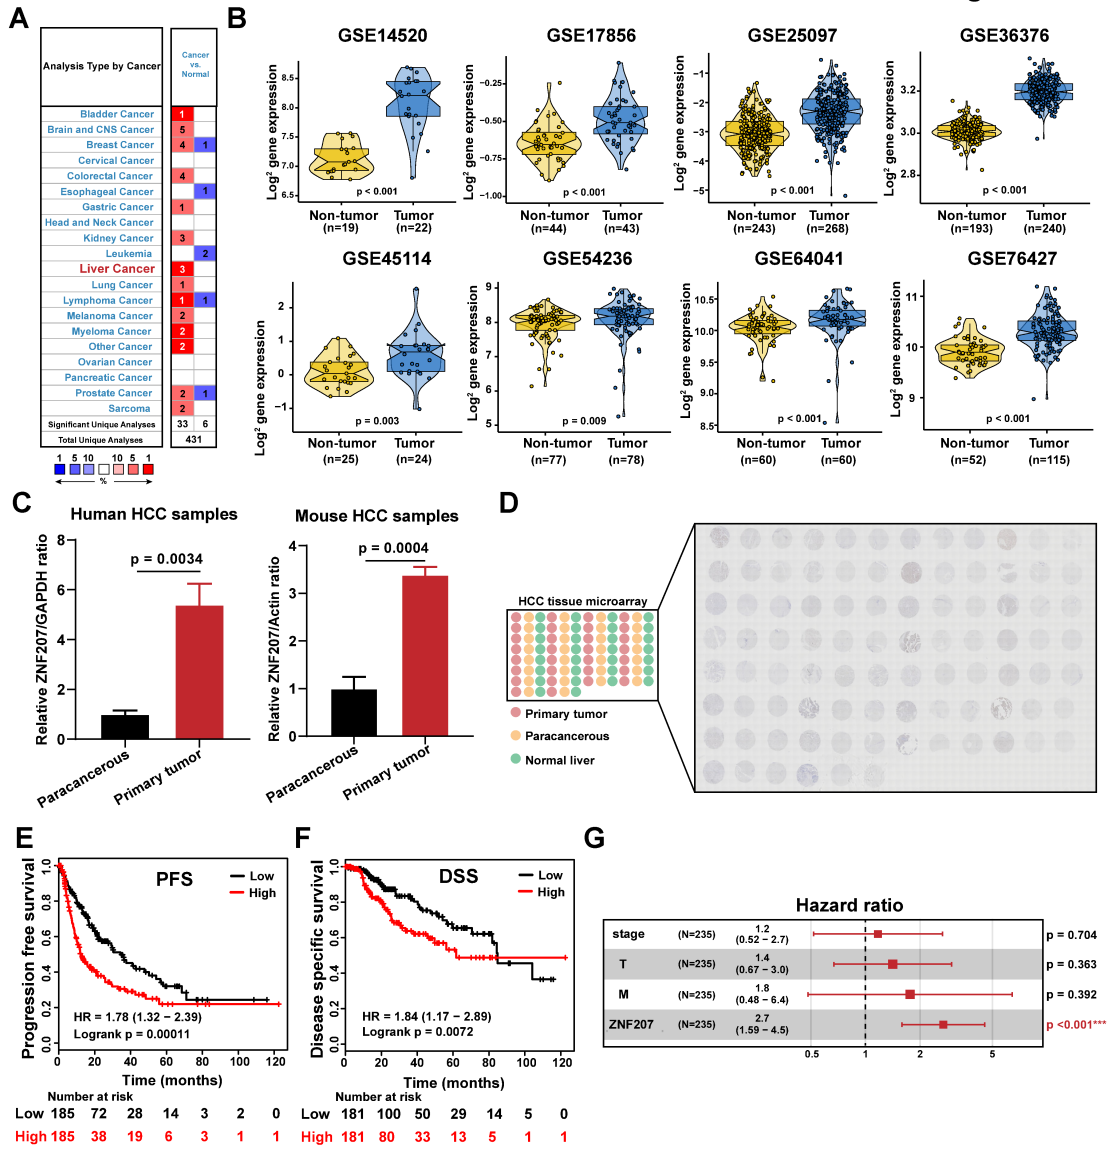

Supplement: jitc-2021-004414supp002_data_supplement.pdf [file jitc-2021-004414supp002_data_supplement.pdf]

Figure S5

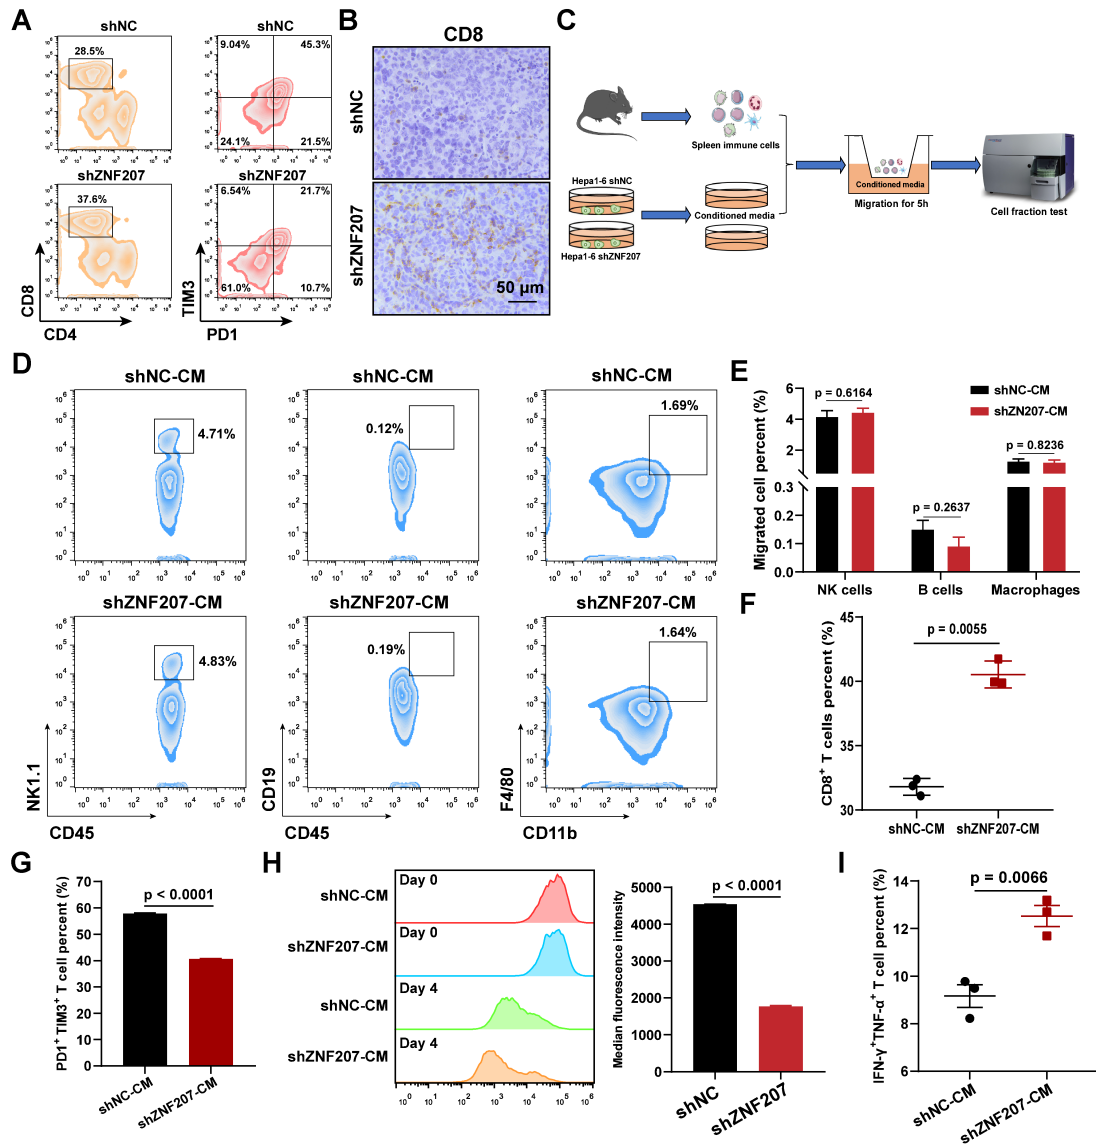

Supplement: jitc-2021-004414supp005_data_supplement.pdf [file jitc-2021-004414supp005_data_supplement.pdf]

Figure S6

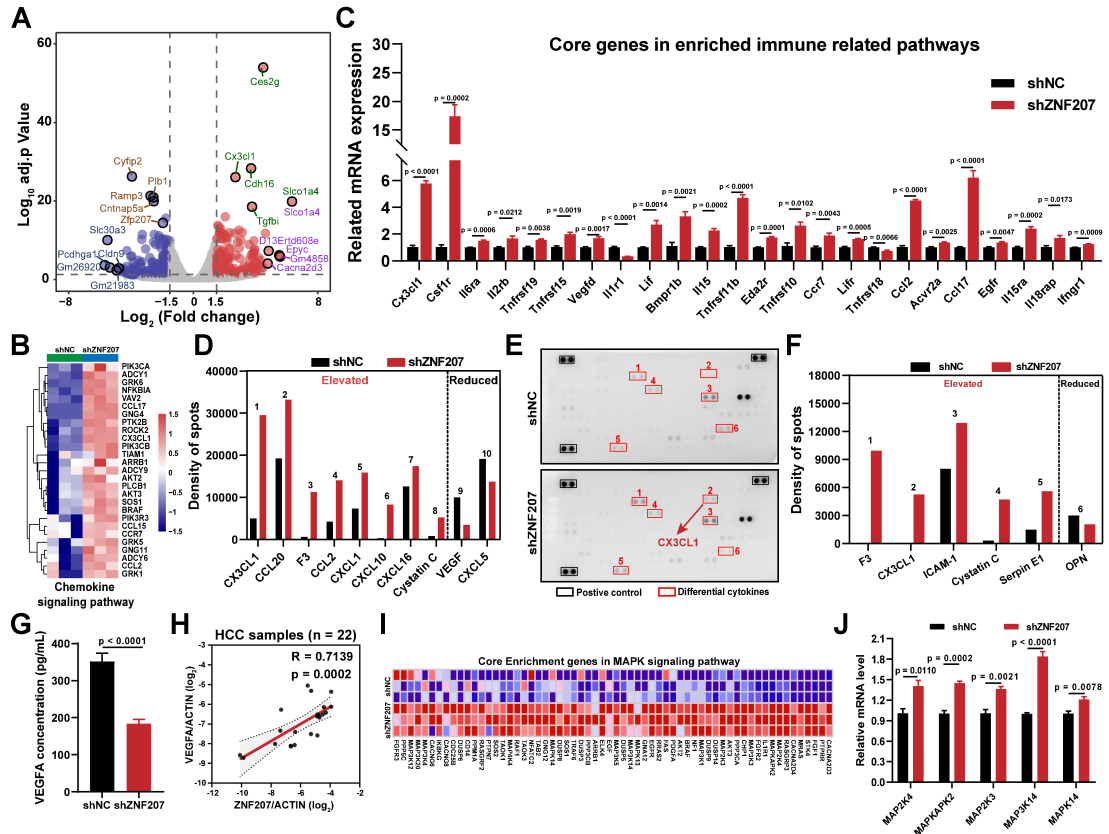

Supplement: jitc-2021-004414supp006_data_supplement.pdf [file jitc-2021-004414supp006_data_supplement.pdf]
